# Supplementary material for: A quaternized mesoporous silica/polysulfone composite membrane for an efficient alkaline fuel cell application
Source: Royal Society of Chemistry journal article supplement (doi:10.1039/c5ra04144a), 2015-01-01
Supplement: c5ra04144a1.pdf [file c5ra04144a1.pdf]

## RSC Advances Supporting Information

### Quaternized Mesoporous Silica/polysulfone Composite Membrane for an efficient alkaline fuel cell application

Vijayakumar Elumalai and Dharmalingam Sangeetha \*

*Department of Mechanical Engineering, Anna University, Chennai - 600 025, India*

Email: [sangeetha@annauniv.edu](mailto:sangeetha@annauniv.edu)

Phone: +91- 44- 2235 7763, Fax: +91- 44- 2235 7744

#### FT-IR:

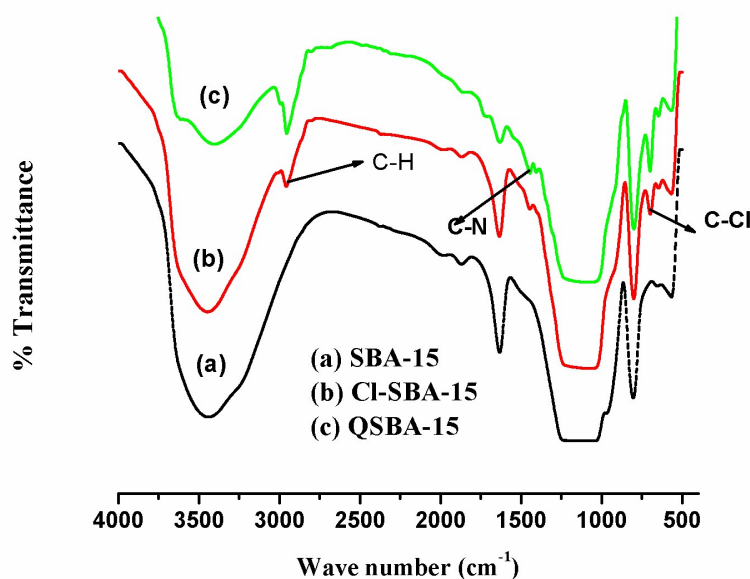

Fig. SF-1 FTIR spectrum of SBA-15(a), CMSBA-15(b) and QSBA-15(c)

FT-IR spectrum of SBA-15(a), CMSBA-15(b) and QSBA-15(c) are shown in the fig.2. Pure SBA-15 shows the well-known IR absorption bands. The stretching vibration of O-H in the silanol groups was observed in the range of 3600-3400 cm<sup>-1</sup>. The bands at around

1620 $\text{cm}^{-1}$  can be attributed to bending vibrations of O-H bonds and the bands at 1080 $\text{cm}^{-1}$  due to asymmetrical stretching vibration of Si-O-Si bonds. The bands at 960  $\text{cm}^{-1}$  were due to the stretching vibrations of free silanol (Si-OH) groups on the surface of the amorphous silanol samples. Symmetrical stretching vibrations of Si-O-Si bonds belonging to ring structures were observed around 795-790  $\text{cm}^{-1}$ . In fig (b) two new bands assigned to  $\text{CH}_2$  and C-Cl appeared at 2929  $\text{cm}^{-1}$  and at 702  $\text{cm}^{-1}$  respectively. The peaks confirmed that the surface has been successfully functionalized with chloromethyl group<sup>28</sup>. In spectrum c, which corresponds to quaternized functionalized SBA-15(Q-SBA-15) N-C stretching appeared at 1452  $\text{cm}^{-1}$  and intensity of  $\text{CH}_2$  peak increased due to the increase of methyl group in quaternary ammonium.

### Particle size

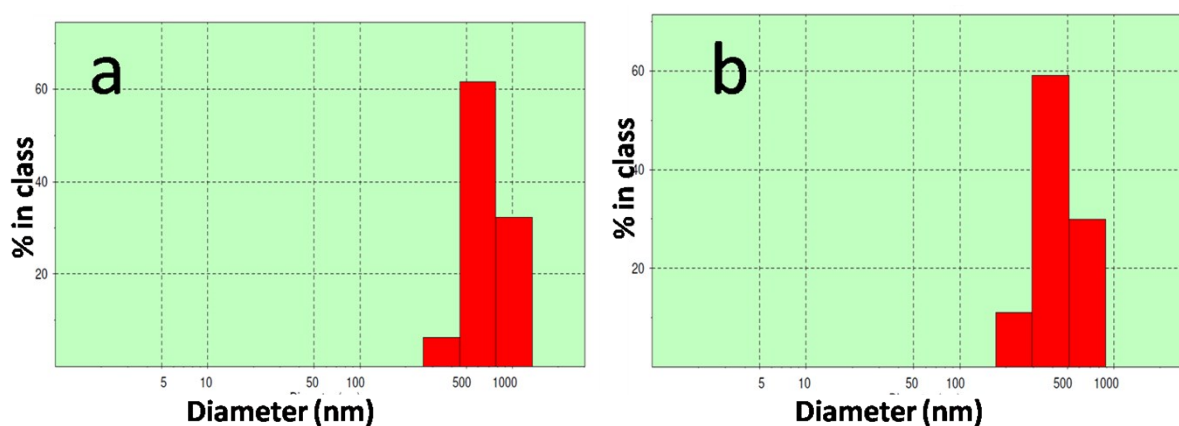

Fig.SF-2 Particle size of SBA-15(a) and QSBA-15(b)

## EIS Nyquist Plot

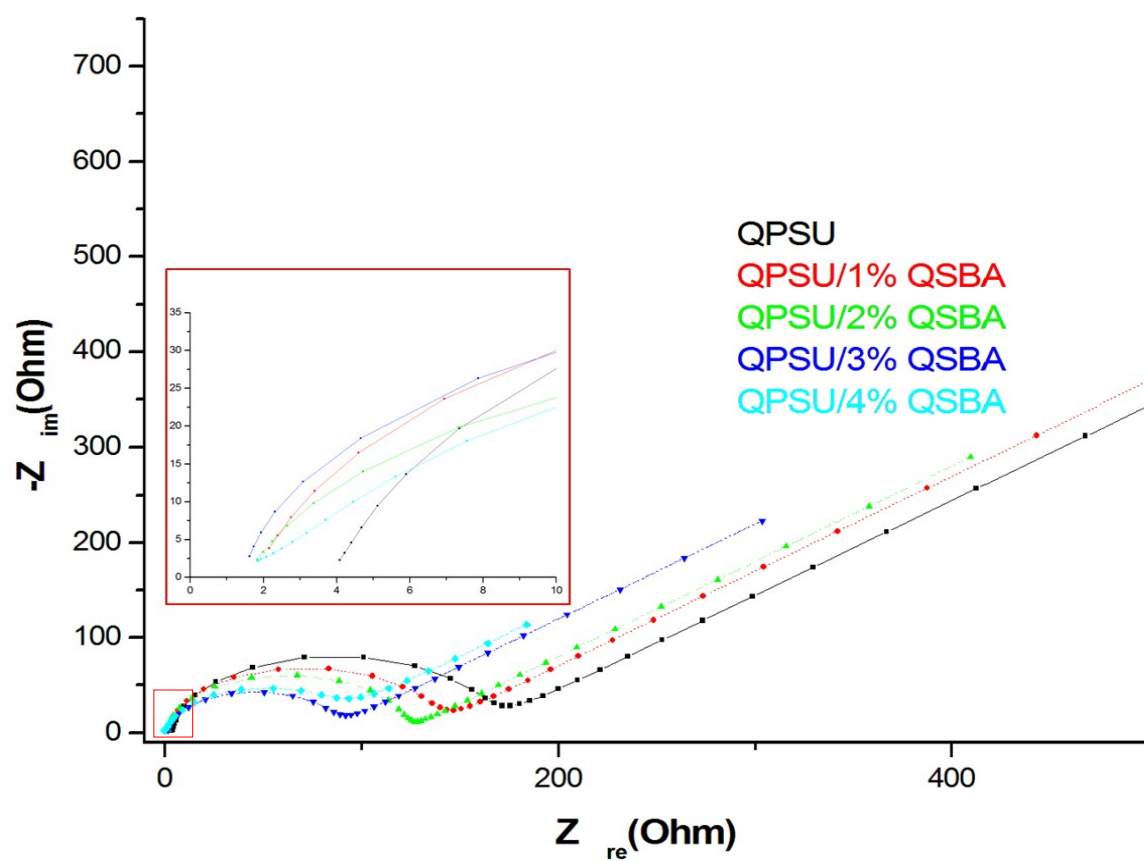

Fig.SF-3 EIS Nyquist Plot for composite membrane
